# Supplementary material
Source: Springer Nature journal article supplement (https://www.springermedizin.de/resource/supplementary/12913_2010_1605_MOESM1_ESM.pdf/9529368)
Supplement: MOESM1 [file 9529368]

Table 1: Socio-demographic background of the female sex workers included in the sample(N=425) in 2006

| Variables                                          | N          | Percentage |
|----------------------------------------------------|------------|------------|
| <b>Age</b>                                         |            |            |
| 15-19                                              | 43         | 10.1       |
| 20-29                                              | 269        | 63.3       |
| 30 and above                                       | 113        | 26.6       |
| Mean (SD)                                          | 26 (6.04)  |            |
| <b>Level of education</b>                          |            |            |
| Illiterate                                         | 144        | 33.9       |
| Informal-primary level                             | 213        | 50.1       |
| Secondary and above                                | 68         | 16.0       |
| <b>Years of education completed</b>                |            |            |
| None                                               | 275        | 64.7       |
| ≤ 1 year                                           | 35         | 8.2        |
| 2-5 years                                          | 41         | 9.6        |
| 6-10 years                                         | 63         | 14.8       |
| > 10 years                                         | 11         | 2.6        |
| <b>Types of FSWs</b>                               |            |            |
| Establishment based                                | 117        | 27.5       |
| Street based                                       | 308        | 72.5       |
| <b>Caste/ethnicity</b>                             |            |            |
| Brahmin / Chhetri                                  | 154        | 36.2       |
| Newar                                              | 63         | 14.8       |
| Janajati<br>(Gurung/Rai/Limbu/Magar/Tamang/Sherpa) | 187        | 44.0       |
| Chaudhari / Madhesi                                | 15         | 3.5        |
| Dalit caste (Kami / Damai / Sarki)                 | 6          | 1.4        |
| <b>Religion</b>                                    |            |            |
| Hindu                                              | 289        | 68.0       |
| Buddhist                                           | 99         | 23.3       |
| Christian/Muslim                                   | 37         | 8.7        |
| <b>Total</b>                                       | <b>425</b> | <b>100</b> |
